# Supplementary material
Source: Springer Nature journal article supplement (https://www.springermedizin.de/resource/supplementary/12939_2008_126_MOESM1_ESM.pdf/9551542)
Supplement: MOESM1 [file 9551542]

6717 births identified

1030 births for which neonatal outcome not ascertained  
13 Family not found  
798 Family moved within Mumbai  
163 Family moved out of Mumbai  
56 Mother moved to in-laws or natal home

5687 births with known neonatal outcome  
86 stillbirths  
5601 live births and 117 neonatal deaths

449 births for which interview not conducted  
247 Moved home permanently  
61 Away for extended period  
12 Could not be located  
14 Repeatedly out during home visits  
66 Refused interview  
8 language or understanding problem  
41 Tools incomplete

5238 births with interview information
